# Supplementary material
Source: PubMed Central journal article supplement (PMC4669562)
Supplement: NIHMS737692-supplement-supplement.pdf [file NIHMS737692-supplement-supplement.pdf]

## Supplementary Appendix

This appendix has been provided by the authors to give readers additional information about their work.

Supplement to: Kainer MA, Reagan DR, Nguyen DB, et al. Fungal infections associated with contaminated methylprednisolone in Tennessee. *N Engl J Med* 2012;367:2194-203. DOI: 10.1056/NEJMoa1212972

## **Members of the Tennessee Meningitis Fungal Investigation Team**

**(in alphabetical order)**

Angela A. Cleveland, MPH (4)

Kaitlin Benedict, MPH (4)

Christopher Braden, MD (4)

Mary Brandt, PhD (4)

L. Rand Carpenter, DVM (1)

Alice Guh, MD, MPH (2)

Julie Harris, PhD, MPH (4)

John Jernigan, MD, MS (2)

Robert H. Latham MD (5)

Anastasia P. Litvintseva, PhD (4)

Shawn Lockhart, PhD (4)

Rendi L. Murphree, MS, PhD (1)

Dana Pepe, BA (4)

Anne E. Purfield, PhD (3, 4)

Brenda L. Rue, BSN (1)

J. Todd Weber, MD (2)

Caleb B. Wiedeman, MPH (1)

- 1) Tennessee Department of Health, Nashville, TN,
- 2) Division of Healthcare Quality Promotion, Centers for Disease Control and Prevention
- 3) Epidemic Intelligence Service, Scientific Education and Professional Development  
Program Office, Centers for Disease Control and Prevention
- 4) Division of Foodborne, Waterborne, and Environmental Diseases, Centers for Disease  
Control and Prevention
- 5) Chief of Medicine and Infectious Diseases, St. Thomas Hospital, Nashville, TN.
